# Supplementary material for: Associations between common ECG abnormalities and out-of-hospital cardiac arrest
Source: PubMed Central journal article supplement (PMC6546195; doi:10.1136/openhrt-2018-000905), 2019-05-21
Supplement: openhrt-2018-000905supp001.pdf [file openhrt-2018-000905supp001.pdf]

# Supplementary material

1

2

3 *Page 2 – Additional description of ECG variables analyzed*

4 *Page 3-8 – Detailed list of ICD10 and ATC codes used to define comorbidities and medicine use.*

5 *Page 9-12 – Additional analysis*

6 *Page 13 – Accuracy of the 12SL Marquette algorithm*

7 *Page 14 – References*

## 8 **Additional description of ECG variables analyzed**

9 The definition of ST-elevation was slightly modified as the measurement of the ST segment was performed  
10 at QRS offset plus 1/16 of the average RR interval known as the STM point measure in the 12SL algorithm  
11 (equivalent to about 80 ms after QRS offset in most cases). This measurement point was selected instead of  
12 the J-point because a notched or slurred appearance of the terminal QRS complex (also described as early  
13 repolarization) can make it difficult to define the J-point.[1] LBBB and NSIB are known to affect the  
14 repolarization of the heart causing ST-deviations.[2–4] Consequently, when ST-T deviation was  
15 concomitantly present with LBBB or NSIB we disregarded the finding. In patients with RBBB, ST-T deviations  
16 in V1-V3 are common.[4] When ST-T deviations in V1-V3 were present together with RBBB the ST-T  
17 deviations were disregarded.

18 Sokolow-Lyon and Cornell sex-specific voltage criteria were used to identify ECG LVH .[5,6] The criteria for  
19 LVH have low predictive value when applied on an ECG with identified LBBB, RBBB and NSIB.[7] ST-T  
20 deviations together with ECGs with hypertrophy have been associated with larger left ventricular mass and  
21 risk of cardiovascular disease.[7] Consequently, if LBBB, RBBB, or NSIB were identified, ECGs were not  
22 assigned the Sokolow-Lyon and Cornell LVH criteria.

23 ST-T deviations together with the hypertrophy criteria were acknowledged and included in the analysis. In  
24 accordance with the Third Universal Myocardial Infarction Definition, pathologic Q-waves, as a sign of prior  
25 myocardial infarction, were only defined when hypertrophy criteria or LBBB were absent.[4]

27 **Detailed list of ICD-10 and ATC codes used for defining comorbidity and medication**

| <b>Table S1: ICD-10 codes of comorbidities</b> |                                                     |                                      |
|------------------------------------------------|-----------------------------------------------------|--------------------------------------|
| <b>Disease</b>                                 | <b>ICD10</b>                                        | <b>Years before baseline<br/>ECG</b> |
| <b>Cardiac comorbidities</b>                   |                                                     |                                      |
| Ischemic heart disease                         | I20, I25                                            | 5                                    |
| Previous myocardial infarction                 | I21, I22, I23, I24                                  | 5                                    |
| Cardiomyopathy                                 | I119, I517, I42, I43                                | 5                                    |
| Heart failure                                  | I110, I50                                           | 5                                    |
| Valvular heart disease                         | I34, I35, I36, I37                                  | 5                                    |
| Congenital heart disease                       | Q20, Q21, Q22, Q23, Q24, Q25                        | 5                                    |
| Atrial fibrillation/atrial flutter             | I48                                                 | 5                                    |
| Other cardiac arrhythmias                      | I44, I45, I47, I49                                  | 5                                    |
| Other cardiac disease                          | I30, I31, I32, I33, I38, I39, I40, I41, I51,<br>I52 | 5                                    |
|                                                |                                                     |                                      |
| <b>Non-cardiac comorbidities</b>               |                                                     |                                      |
| Cerebrovascular disease                        | I60, I61, I62, I63, I64, I65, I66, I67, I68,<br>I69 | 5                                    |
| Perifer vascular disease                       | I70, I71, I72, I74, R02                             | 5                                    |
| Malignant disease                              | C00-C97                                             | 5                                    |

|                                       |                                              |   |
|---------------------------------------|----------------------------------------------|---|
| Renal disease                         | N03, N04, N17, N18, N19, R34, I12, I13, Z992 | 5 |
| Liver disease                         | K70, K71, K72, K73, K74, K75, K76, K77       | 5 |
| Chronic obstructive pulmonary disease | J41, J42, J43, J44                           | 5 |

28

29

| <b>Table S2: ATC codes of medication</b>                                                                                             |                 |                         |
|--------------------------------------------------------------------------------------------------------------------------------------|-----------------|-------------------------|
| <b>Medications</b>                                                                                                                   | <b>ATC code</b> | <b>Days before OHCA</b> |
| QT prolonging medication*                                                                                                            | See Table 3     | 180                     |
| Glucose lowering medicine                                                                                                            | C01D            | 180                     |
| Beta blockers                                                                                                                        | C01B            | 180                     |
| Diuretics                                                                                                                            | C07             | 180                     |
| Angiotensin converting enzyme inhibitors and angiotensin receptor blockers                                                           | C08             | 180                     |
| Calcium channel blockers                                                                                                             | C01AA05         | 180                     |
| * QT interval prolonging drugs were acquired from <a href="http://www.qtdrugs.org">www.qtdrugs.org</a> (accessed February 26, 2016). |                 |                         |

30

31

32

| <b>Table S3: ATC codes of QT prolonging medication (detailed list)*</b> |                                                                                                                                                                                                                                                                                                                                                                                                                                                            |
|-------------------------------------------------------------------------|------------------------------------------------------------------------------------------------------------------------------------------------------------------------------------------------------------------------------------------------------------------------------------------------------------------------------------------------------------------------------------------------------------------------------------------------------------|
| <b>QT prolonging medication (Main ATC groups)</b>                       | <b>ATC code</b>                                                                                                                                                                                                                                                                                                                                                                                                                                            |
| Cardiovascular system                                                   | <b>Amiodarone C01BD01, disopyramide C01BA03, dofetilide C01BD04, Dronedarone C01BD07, flecainide C01BC04, ibutilide C01BD05, procainamide C01BA02, quinidine C01BA01, Sotalol C07AA07, Probucol C10AX02, Bepridil C08EA02</b><br>Ranolazine C01EB18, Isradipine C08CA03, Moexipril C09AA13, Nicardipine C08CA04                                                                                                                                            |
| Genito-urinary system and sex hormones                                  | <b>Papaverine G04BE02, Alfuzosin G04CA01, Mirabegron G04BD12, Tolterodine G04BD07, Vardenafil G04BE09, Apomorphine G04BE07, Mifepristone G03XB01</b>                                                                                                                                                                                                                                                                                                       |
| Antineoplastic and immunomodulating agents                              | <b>Arsenic trioxide L01XX27, Vandetanib L01XE12, Anagrelide L01XX35, Oxaliplatin L01XA03, Dabrafenib L01XE23, Eribulin L01XX41, Lapatinib L01XE07, Nilotinib L01XE08, Sunitinib L01XE04, Tamoxifen L02BA01, Vorinostat L01XX38, Toremfene L02BA02, Crizotinib L01XE16, Vemurafenib L01XE15, Bortezomib L01XX32, Bosutinib L01XE14, Dasatinib L01XE06, Pazopanib L01XE11, Sorafenib L01XE05, Ceritinib L01XE28, Degarelix L02BX02, Leuprorelin L02AE02,</b> |

|                |                                                                                                                                                                                                                                                                                                                                                                                                                                                                                                                                                                                                                                                                                                                                                                                                                                                                                                                                                                      |
|----------------|----------------------------------------------------------------------------------------------------------------------------------------------------------------------------------------------------------------------------------------------------------------------------------------------------------------------------------------------------------------------------------------------------------------------------------------------------------------------------------------------------------------------------------------------------------------------------------------------------------------------------------------------------------------------------------------------------------------------------------------------------------------------------------------------------------------------------------------------------------------------------------------------------------------------------------------------------------------------|
|                | Lenvatinib L01XE29, Tacrolimus L04AD02,<br>Panobinostat L01XX42, Fingolimod L04AA27                                                                                                                                                                                                                                                                                                                                                                                                                                                                                                                                                                                                                                                                                                                                                                                                                                                                                  |
| Nervous system | <b>Propofol N01AX10,</b><br><b>Cocaine N01BC01, sevoflurane N01AB08,</b><br><b>Methadone N07BC02, levomethadone N07BC05,</b><br><b>Citalopram N06AB04, Escitalopram N06AB10,</b><br><b>Haloperidol N05AD01, Mesoridazine N05AC03,</b><br><b>Pimozide N05AG02, Thioridazine N05AC02,</b><br><b>Chlorpromazine N05AA01, levomepromazine</b><br><b>N05AA02, droperidol N05AD08, Sulpiride</b><br><b>N05AL01, Donepezil N06DA02, Atroxetine</b><br>N06BA09, Felbamate N03AX10, Apomorphine<br>N04BC07, Tetrabenazine N07XX06,<br>Dexmedetomidine N05CM18,<br>Venlafaxine N06AX16, Asenapine N05AH05,<br>Iloperidone N05AX14, Aripiprazole N05AX12,<br>Clozapine N05AH02, Olanzapine N05AH03,<br>Paliperidone N05AX13, Risperidone N05AX08,<br>Sertindole N05AE03, Pipamperone N05AD05,<br>Lithium N05AN01, Clomipramine N06AA04,<br>Desipramine N06AA01, Imipramine N06AA02,<br>Mirtazapine N06AX11, Nortriptyline N06AA10,<br>Trimipramine N06AA06, Cyamemazine N05AA06 |

|                                                                     |                                                                                                                                                                                                                                                                                                                                                                                                                                                                                                                                                        |
|---------------------------------------------------------------------|--------------------------------------------------------------------------------------------------------------------------------------------------------------------------------------------------------------------------------------------------------------------------------------------------------------------------------------------------------------------------------------------------------------------------------------------------------------------------------------------------------------------------------------------------------|
| Alimentary tract and metabolism                                     | <b>Ondansetron A04AA01, Domperidone A03FA03,</b><br><b>Cisapride A03FA02, Papaverine A03AD01,</b><br>Dolasetron A04AA04, Tropisetron A04AA03,<br>Granisetron A04AA02, Famotidine A02BA03                                                                                                                                                                                                                                                                                                                                                               |
| Respiratory system                                                  | <b>Astemizole R06AX11, Terfenadine R06AX12,</b><br>Promethazine R06AD02, Hydrocodone R05DA03                                                                                                                                                                                                                                                                                                                                                                                                                                                           |
| Antiparasitic products, insecticides and repellents                 | <b>Chloroquine P01BA01, Halofantrine P01BX01,</b><br><b>Pentamidine P01CX01,</b> Artesimol and<br>piperazine P01BF05                                                                                                                                                                                                                                                                                                                                                                                                                                   |
| Blood and blood forming organs                                      | <b>Cilostazol B01AC23,</b>                                                                                                                                                                                                                                                                                                                                                                                                                                                                                                                             |
| Antiinfectives for systemic use                                     | <b>Azithromycin J01FA10, Clarithromycin J01FA09,</b><br><b>Erythromycin J01FA01, grepafloxacin J01MA11,</b><br><b>levofloxacin J01MA12, Moxifloxacin J01MA14,</b><br><b>Gatifloxacin J01MA16, Sparfloxacin J01MA09,</b><br><b>Ciprofloxacin J01MA02, Fluconazole J02AC01,</b><br>Atazanavir J05AE08, Foscarnet J05AD01,<br>Rilpivirine J05AG05, Saquinavir J05AE01,<br>Bedaquiline J04AK05, Delamanid J04AK06,<br>Gemifloxacin J01MA15, Norfloxacin J01MA06,<br>Ofloxacin J01MA01, Roxithromycin J01FA06,<br>Telavancin J01XA03, Telithromycin J01FA15 |
| Systemic hormonal preparations, excluding sex hormones and insulins | Oxytocin H01BB02, Pasireotide H01CB05                                                                                                                                                                                                                                                                                                                                                                                                                                                                                                                  |
| Musculo-skeletal system                                             | Tizanidine M03BX02                                                                                                                                                                                                                                                                                                                                                                                                                                                                                                                                     |

|                                                                                                                                                                                                                                                                                                                                                                                               |                                       |
|-----------------------------------------------------------------------------------------------------------------------------------------------------------------------------------------------------------------------------------------------------------------------------------------------------------------------------------------------------------------------------------------------|---------------------------------------|
| Various                                                                                                                                                                                                                                                                                                                                                                                       | Perflutren lipid microspheres V08DA06 |
| <p>* The list of QT interval prolonging drugs were defined according to the list of QT prolonging drugs at <a href="http://www.qtdrugs.org">www.qtdrugs.org</a> (accessed February 26, 2016).</p> <p>Drugs highlighted with <b>bold</b> text are drugs classified with known risk of torsades de pointe, while the other drugs are classified with a possible risk of torsades de pointe.</p> |                                       |

33

34

35

36

37

38

39

40

41

42

43

44



45 **Additional analysis**

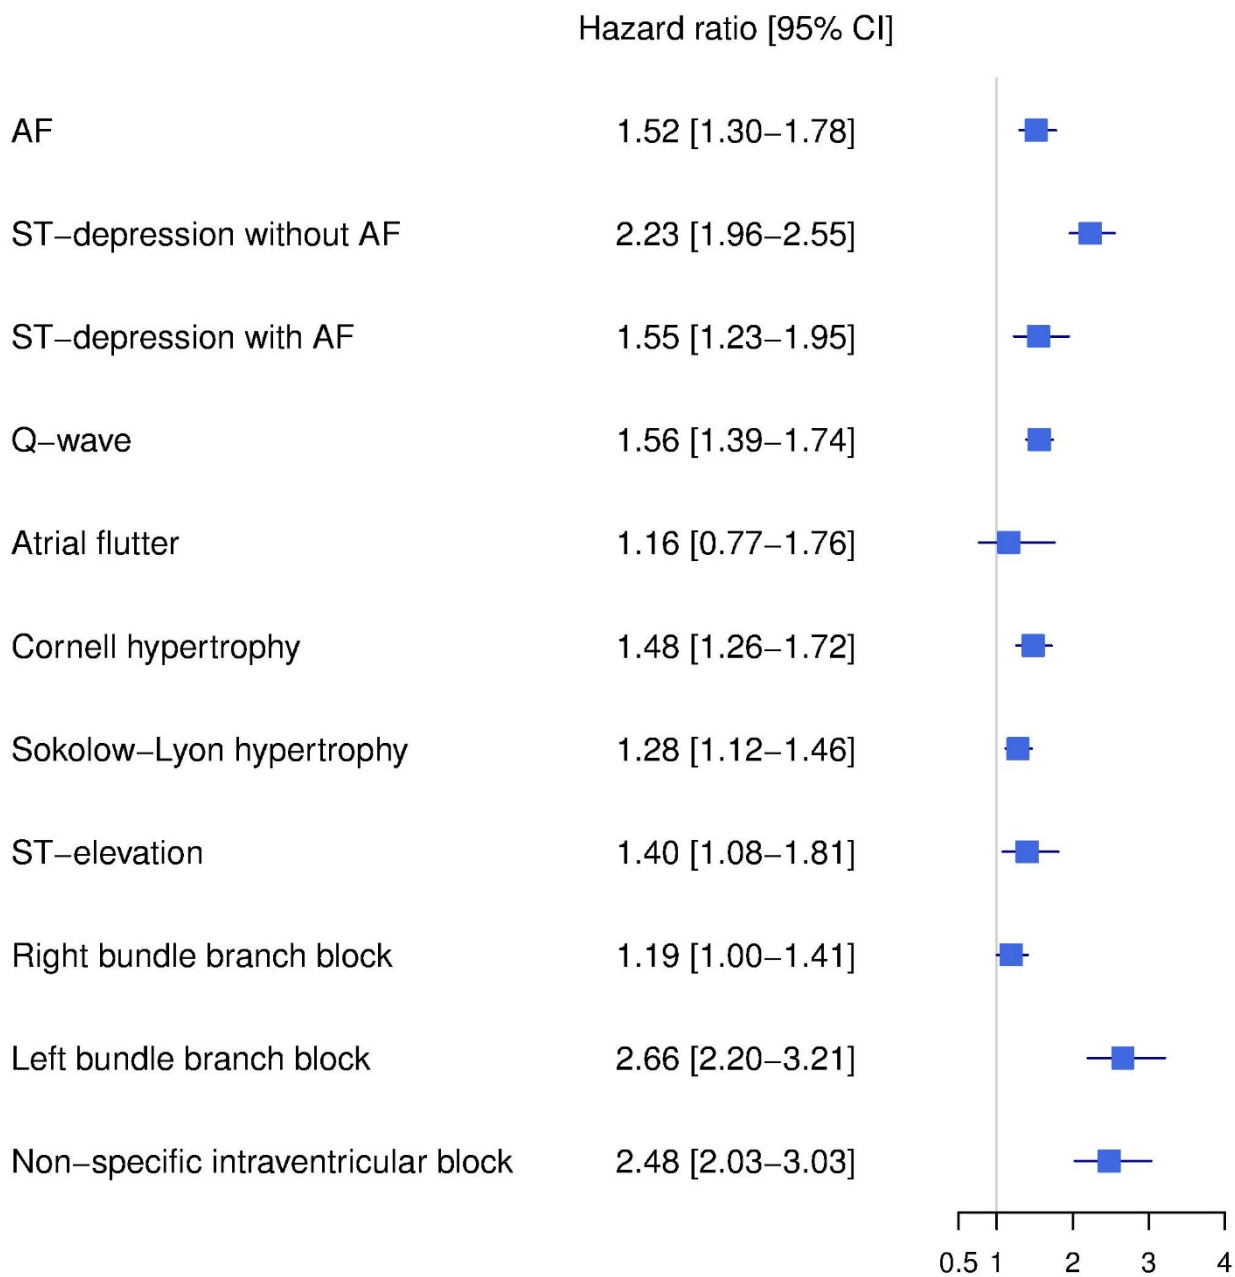

46

47 **Figure 1 title:** Fully adjusted multivariable cox regression model showing the association between different  
 48 ECG abnormalities and out-of-hospital cardiac arrest.

49 Figure 1 legend: The figure shows the results from the multivariable cox regression model (atrial fibrillation,  
 50 ST-depression, Q-wave, atrial flutter, Cornell hypertrophy, Sokolow-Lyon hypertrophy, ST-elevation, LBBB,  
 51 RBBB and non-specific intraventricular block). The model was adjusted for age, sex, heart failure, ischemic

52 heart disease, prior myocardial infarction, cardiomyopathy, atrial fibrillation, atrial flutter, congenital heart  
53 disease, valvular heart disease, other cardiac arrhythmia, other cardiac disease, cerebro vascular disease,  
54 perifer vascular disease, chronic obstructive pulmonary disease, malignant disease, renal disease, liver  
55 disease, QTc prolonging medication, glucose lowering medication, beta-blockers, diuretics, ACE  
56 inhibitor/angiotensin II receptor blockers, calcium inhibitors.

57 HR hazard ratio; 95% CI – 95% confidence interval; AF atrial fibrillation; LBBB left bundle branch block; RBBB  
58 right bundle branch block.

59

60

61 **Five-year risk of out-of-hospital cardiac arrest**

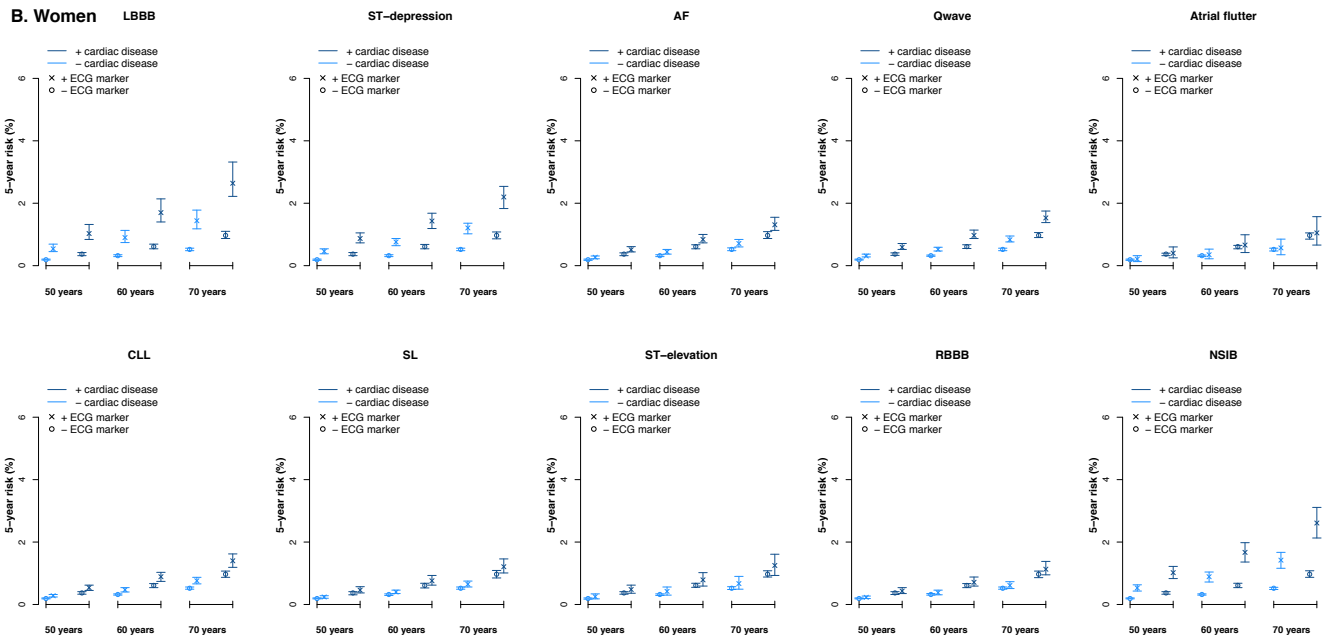

62

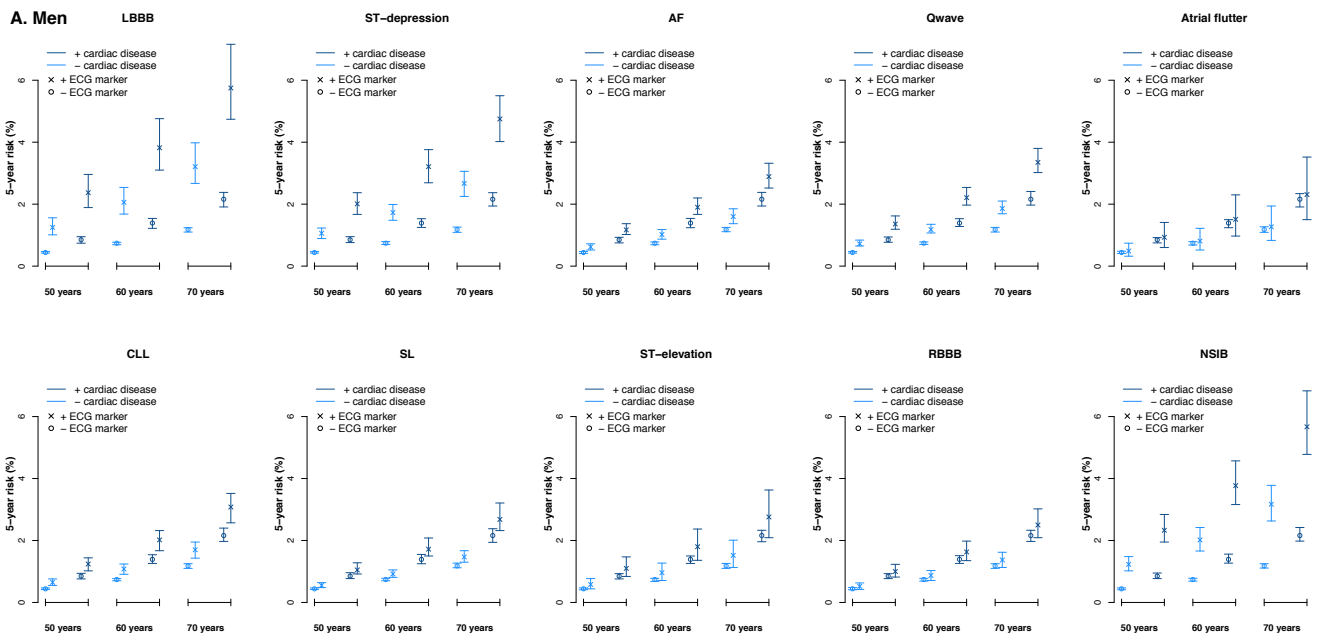

63

64

65 **Figure 2**

66 Figure 2A+B title: Ten-year risks of out-of-hospital cardiac arrest according to sex, cardiac disease status,  
67 age, and the different ECG abnormalities

68 Figure 2A+B legend: The figure shows the 5-year risks of suffering an out-of-hospital cardiac arrest for the  
69 different ECG abnormalities according to sex, whether or not the patient had known cardiac disease at the  
70 time of the ECG recording, and age at 50, 60 and 70 years. Cardiac disease included: Heart failure, ischemic  
71 heart disease, prior myocardial infarction, cardiomyopathy, atrial fibrillation, atrial flutter, congenital heart  
72 disease, valvular heart disease, other cardiac arrhythmia, other cardiac disease. The analyses considered  
73 the competing risk of death from other cause.

74 AF atrial fibrillation; CLL Cornell criteria of left ventricular hypertrophy; LBBB left bundle branch block; NSIB  
75 non-specific intraventricular

76

## 77 **Accuracy of the 12SL Marquette algorithm**

78 The accuracy of the 12SL Marquette algorithm is described thoroughly.[8] Atrial fibrillation has been found  
79 to have a sensitivity ranging from 76.1%-90.8% and a specificity of 98.9-99.6%. Atrial flutter has a sensitivity  
80 ranging from 61.0%-65.9% and a specificity of 99.9%, Left Bundle Branch Block a sensitivity from 78%-90.9%  
81 and a specificity from 99.9%-100%. Right Bundle Branch Block has been found to have a sensitivity ranging  
82 from 90%-93.2% and a specificity of 99.8%-100%.[8]

83 Data on the accuracy of 12SL measurements we refer to the GE Marquette 12SL ECG Analysis Program  
84 Physician's Guide.[8]

85

86

87 **Supplementary material references**

- 88 1 Rasmussen PV, Nielsen JB, Pietersen A, *et al.* Electrocardiographic precordial ST-segment deviations  
89 and the risk of cardiovascular death: results from the Copenhagen ECG Study. *J Am Heart Assoc*  
90 2014;**3**:e000549. doi:10.1161/JAHA.113.000549
- 91 2 Deshpande A, Birnbaum Y. ST-segment elevation: Distinguishing ST elevation myocardial infarction  
92 from ST elevation secondary to nonischemic etiologies. *World J Cardiol* 2014;**6**:1067–79.  
93 doi:10.4330/wjc.v6.i10.1067
- 94 3 Wang K, Asinger RW, Marriott HJL. ST-segment elevation in conditions other than acute myocardial  
95 infarction. *N Engl J Med* 2003;**349**:2128–35. doi:10.1056/NEJMra022580
- 96 4 Thygesen K, Alpert JS, Jaffe AS, *et al.* Third universal definition of myocardial infarction. *Circulation*  
97 2012;**126**:2020–35. doi:10.1161/CIR.0b013e31826e1058
- 98 5 Sokolow M, Lyon TP. The ventricular complex in right ventricular hypertrophy as obtained by  
99 unipolar precordial and limb leads. *Am Heart J* 1949;**38**:273–94.
- 100 6 Casale PN, Devereux RB, Alonso DR, *et al.* Improved sex-specific criteria of left ventricular  
101 hypertrophy for clinical and computer interpretation of electrocardiograms: validation with autopsy  
102 findings. *Circulation* 1987;**75**:565–72.
- 103 7 Hancock EW, Deal BJ, Mirvis DM, *et al.* AHA/ACCF/HRS recommendations for the standardization  
104 and interpretation of the electrocardiogram: part V: electrocardiogram changes associated with  
105 cardiac chamber hypertrophy: a scientific statement from the American Heart Association  
106 Electrocardiography. *Circulation* 2009;**119**:e251–61. doi:10.1161/CIRCULATIONAHA.108.191097
- 107 8 Healthcare G. Marquette™ 12SL™ ECG Analysis Program - Statement of Validation and Accuracy.  
108 2008.
